# Supplementary material
Source: MDPI journal article supplement (https://www.mdpi.com/2073-4344/11/10/1240)
Supplement: s1 [file s1]

## Screening of acetyl donor and robust enzymatic synthesis of acetyl-CoA by 10-deacetylbaecatin III-10- $\beta$ -O-acetyltransferase

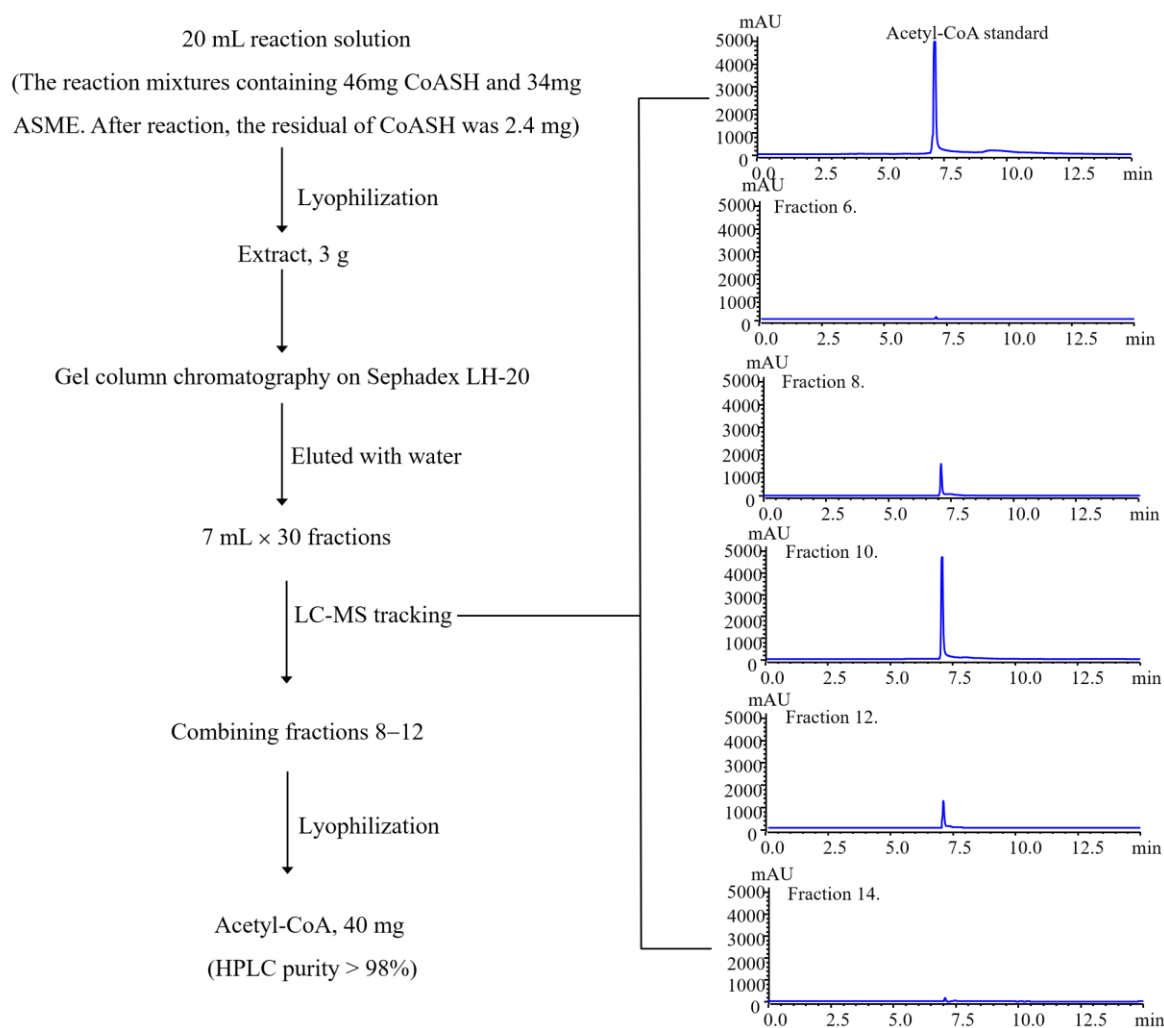

Figure S1. Flow chart of acetyl-CoA purification.

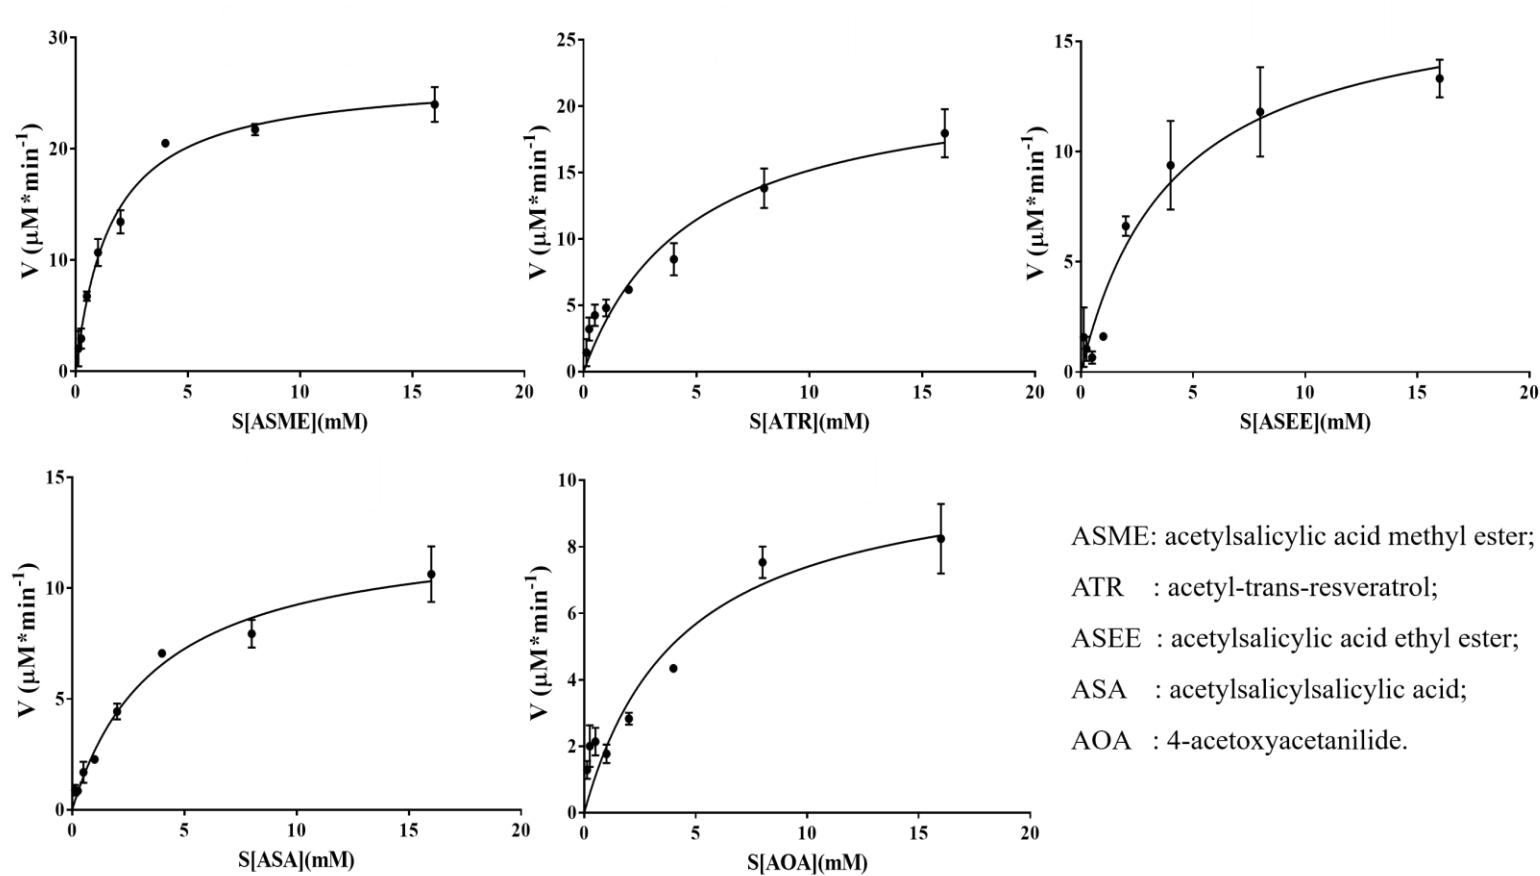

**Figure S2.** Substrate-velocity curves for kinetic parameters of DBAT against five acetyl donors.

The kinetic parameters were determined against ATR, ASME, ASA, ASEE, AOA. The reaction mixtures containing 100 mM Tris-HCl buffer (pH 7.0), an acetyl donor in a range of 0.0125 mM, 0.25 mM, 0.5 mM, 1 mM, 2 mM, 4 mM, 8 mM, and 16 mM, 0.1 mg/mL DBAT, 1 mM CoASH, 1.7 mM  $\text{KH}_2\text{PO}_4$ , and 7.2 mM  $\text{K}_2\text{HPO}_4 \cdot 3\text{H}_2\text{O}$  in a final volume of 200  $\mu\text{L}$  were incubated at 37 °C for 0.5 h. The reactions were terminated by adding 300  $\mu\text{L}$  methanol. The kinetic data were processed via a proportional weighted fit using a nonlinear regression analysis program based on Michaelis–Menten enzyme kinetics.

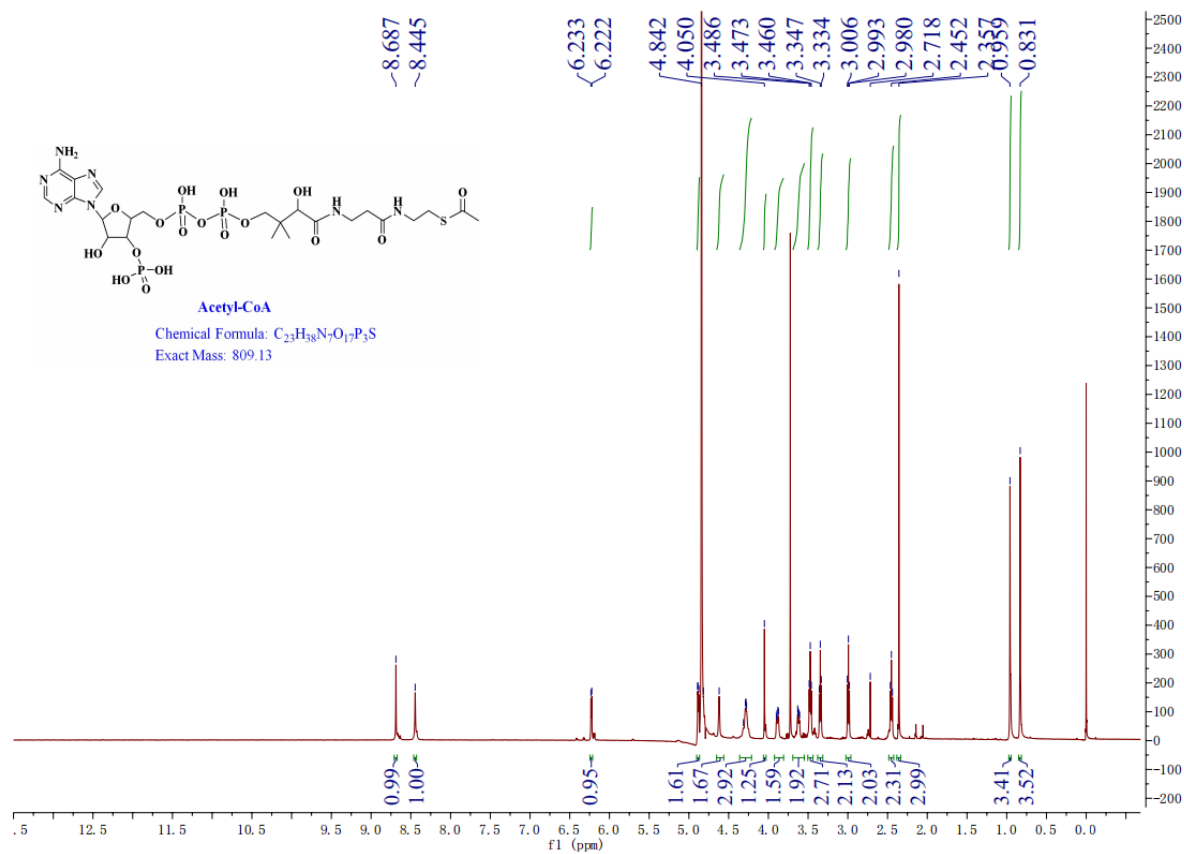

**Figure S3.** The  $^1H$ -NMR spectrum of acetyl-CoA.
